# Supplementary material for: Sub-chronic testosterone treatment increases the levels of epithelial sodium channel (ENaC)-α, β and γ in the kidney of orchidectomized adult male Sprague–Dawley rats
Source: PeerJ. 2016 Jun 30;4:e2145. doi: 10.7717/peerj.2145 (PMC4933084; doi:10.7717/peerj.2145)
Supplement: Data S1 — ENaC a,b & g mRNA fold change analyses and protein band intensity. [file peerj-04-2145-s001.xlsx]

## Sheet: AENaC mRNA
	Group	α-ENaC		GAPDH		ΔCт	Average ΔCт	ΔΔCт	Fold Change	Average FC	SEM	T test
		Cт	Cт Mean	Cт	Cт Mean
	S	18.5917	18.6212	11.0438	11.4062	7.21496	7.11038	0.104585	0.930072	1.04555	0.166242
		19.0514		12.2226
		18.2205		10.9523
		19.3926	19.0286	12.0109	11.9596	7.069		-0.0413791	1.0291
		19.1591		12.2
		18.5342		11.668
		17.9665	17.8695	10.6875	10.8825	6.98707		-0.123304	1.08923
		17.5978		10.9561
		18.0443		11.0038
		18.5628	17.8667	11.0614	10.6962	7.17047		0.0600984	0.959199
		17.504		10.5914
		17.5333		10.4357
	O	19.7979	19.5924	12.2756	11.9415	7.651		0.540619	0.687476	0.956867	0.0595191	0.00120797
		19.4625		11.8038								to S
		19.5169		11.745
		20.0558	19.5792	12.2632	11.9251	7.65414		0.543765	0.685978
		19.144		11.4364
		19.5379		12.0757
		19.4804	19.763	11.8866	12.1903	7.57268		0.462308	0.725824
		19.6711		12.494
		20.1375
		18.0255	18.4204	10.9312	10.9349	7.48546		0.375084	0.771061
		18.9005		11.1306
		18.335		10.743
	T125	18.7893	18.972	11.9945	12.2978	6.67416		-0.436219	1.35305	1.68074	0.106655	0.00407006
		18.8131		12.1949								to O
		19.3135		12.7041
		19.0138	18.5807	12.1575	11.7442	6.83648		-0.273891	1.20906
		17.9859		11.3821
		18.7424		11.6932
		18.5357	18.6628	12.5738	12.1949	6.46788		-0.642494	1.56103
		18.7898		11.9376
				12.0733
		17.5489	18.8439	11.8748	11.9959	6.84796		-0.262421	1.19949
		18.1053		12.1409
		20.8774		11.9721
	T250	19.5841	19.2016	12.6394	12.614	6.58754		-0.522835	1.43678	1.63927	0.0710302	0.000854908
		18.8953		12.9842								to O
		19.1253		12.2185
		19.0964	19.1307	12.0061	12.2382	6.89248		-0.217897	1.16304
		19.3397		12.3061
		18.956		12.4024
		18.4474	18.529	11.9265	11.8093	6.7197		-0.390673	1.31101
		18.6098		12.0724
		18.5297		11.429
		18.4179	17.7253	11.1093	10.9716	6.75367		-0.356706	1.2805
		17.4767		10.6059
		17.2814		11.1998
	T125+FU	18.1832	18.7365	10.3706	10.9044	7.83208		0.721707	0.60638	0.944756	0.0621367	0.00214261
		19.3248		11.5174								to T125
		18.7013		10.8251
		18.643	18.7259	11.2948	11.3396	7.38632		0.275944	0.82591
		18.6263		11.3015
		18.9084		11.4225
		18.8305	19.1902	12.4093	11.7595	7.43065		0.320269	0.80092
		19.3056		11.6383
		19.4343		11.2309
		17.9906	17.8706	10.5941	10.3618	7.50881		0.398431	0.758683
		17.6433		10.0596
		17.9779		10.4317
	T250+FU	17.7851	17.5672	10.9084	10.6094	6.95783		-0.152541	1.11153	1.3136	0.104594	0.00623662
		17.2212		10.3211								to T250
		17.6955		10.5988
		18.8391	18.1531	11.5885	10.8283	7.32478		0.214403	0.861903
		17.5008		10.1029
		18.1193		10.7935
		18.5117	18.7284	11.1603	11.5474	7.18097		0.0705964	0.952244
		18.945		11.9345
		17.6365	17.4496	9.94116	10.3404	7.10925		-0.00112776	1.00078
		17.3514		10.8136
		17.361		10.2663
	T125+FN	19.302	19.4762	11.2128	11.2714	8.20483		1.09445	0.468313	0.795246	0.0888767	0.000791588
		19.7842		11.5654								to T125
		19.3425		11.0359
		18.9294	18.8006	11.0945	10.9916	7.80904		0.698666	0.616142
		18.9586		11.0841
		18.5138		10.7961
		18.5081	18.7279	11.1376	11.3165	7.41133		0.300956	0.811714
		18.9081		11.5122
		18.7674		11.2998
		19.4403	19.4369	11.7243	11.6421	7.79482		0.684439	0.622248
		19.4392		11.6393
		19.4313		11.5627
	T250+FN	18.3718	18.172	10.3387	10.2927	7.87935		0.768976	0.586834	1.14938	0.314335	0.000204016
		17.9723		10.2467								to T250
		17.6999	17.8894	9.89763	10.0167	7.87268		0.762305	0.589554
		17.9305		10.0523
		18.0377		10.1001
		18.225	18.2156	10.7855	10.8297	7.3859		0.275519	0.826153
		18.0703		10.8739
		18.3515
		17.8101	17.6331	9.94572	9.86702	7.76603		0.655657	0.634786
		17.2892		9.95264
		17.7998		9.7027

## Sheet: AENaC WB
	Group	α-ENaC Uncleaved	GAPDH	Ratio of α-ENaC/GAPDH	Average	SEM	T-test
	S	13.4631	12.6209	1.06673	1.13991	0.0729644
		12.377	11.598	1.06717
		18.4009	14.3104	1.28584
	O	9.88864	13.0552	0.757447	0.779901	0.0541581	0.0194516
		13.1424	14.8856	0.882895
		8.51332	12.173	0.699361
	T125	17.5812	11.6237	1.51253	1.33553	0.0952509	0.0129333
		15.8136	13.3332	1.18603
		17.61	13.463	1.30803
	T250	18.454	11.0744	1.66637	1.5327	0.0755285	0.00189471
		17.7364	12.6244	1.40493
		17.5468	11.4925	1.5268
	T125+FU	10.2654	14.4684	0.709504	0.804391	0.0475143	0.016274
		9.57307	11.1791	0.856336
		10.4422	12.3236	0.847332
	T250+FU	12.8362	11.6173	1.10493	0.986335	0.0610072	0.00557687
		9.15734	10.1501	0.902193
		11.5606	12.145	0.951884
	T125+FN	9.58553	14.6823	0.652861	0.727393	0.0652581	0.00869238
		11.1695	13.0264	0.857447
		8.44811	12.574	0.671872
	T250+FN	7.92585	10.8578	0.72997	0.738216	0.0539199	0.00157803
		11.0307	13.2032	0.835458
		7.47806	11.5185	0.649221

## Sheet: BENaC mRNA
	Group	β-ENaC		GAPDH		ΔCт	Average ΔCт	ΔΔCт	Fold Change	Average FC	SEM	T test
		Cт	Cт Mean	Cт	Cт Mean
	S	18.7417	18.5018	11.0438	11.4062	7.09555	6.95107	0.144483	0.904703	1.04555	0.166242
		18.0618		12.2226
		18.7018		10.9523
		19.3076	18.9103	12.0109	11.9596	6.95072		-0.000349632	1.00024
		18.9559		12.2
		18.4676		11.668
		18.1996	17.82	10.6875	10.8825	6.93758		-0.0134876	1.00939
		17.4552		10.9561
		17.8054		11.0038
		17.9555	17.5166	11.0614	10.6962	6.82042		-0.130646	1.09478
		17.6777		10.5914
		16.9166		10.4357
	O	19.1182	19.1907	12.2756	11.9415	7.24921		0.29814	0.8133	0.956867	0.0595191	0.00223596
		19.2742		11.8038								to S
		19.1796		11.745
		19.2811	19.3868	12.2632	11.9251	7.46173		0.510666	0.701898
		19.1452		11.4364
		19.7343		12.0757
		19.7036	19.6423	11.8866	12.1903	7.45197		0.500906	0.706663
		19.1137		12.494
		20.1096
		18.4797	18.3079	10.9312	10.9349	7.37299		0.421919	0.746431
		18.0197		11.1306
		18.4243		10.743
	T125	19.1151	19.1182	11.9945	12.2978	6.82039		-0.130679	1.09481	1.68074	0.106655	0.0052646
		19.3191		12.1949								to O
		18.9204		12.7041
		18.3904	18.6049	12.1575	11.7442	6.86065		-0.0904187	1.06468
		18.5564		11.3821
		18.868		11.6932
		19.1189	18.9653	12.5738	12.1949	6.77042		-0.180649	1.13339
		18.7731		11.9376
		19.0039		12.0733
		18.3255	18.4946	11.8748	11.9959	6.49867		-0.452394	1.36831
		18.2204		12.1409
		18.9379		11.9721
	T250	19.0218	19.267	12.6394	12.614	6.65297		-0.2981	1.22952	1.63927	0.0710302	3.80444e-05
		19.2627		12.9842								to O
		19.5165		12.2185
		18.8238	18.852	12.0061	12.2382	6.61379		-0.337276	1.26337
		19.064		12.3061
		18.6682		12.4024
		18.5835	18.4945	11.9265	11.8093	6.68522		-0.265847	1.20234
		18.396		12.0724
		18.504		11.429
		18.2175	17.6268	11.1093	10.9716	6.65517		-0.295893	1.22764
		17.3445		10.6059
		17.3184		11.1998
	T125+FU	18.2045	18.4711	10.3706	10.9044	7.56675		0.615688	0.652619	0.944756	0.0621367	0.00466291
				11.5174								to T125
		18.7377		10.8251
		18.6541	18.6594	11.2948	11.3396	7.31977		0.3687	0.77448
		18.9646		11.3015
		18.3594		11.4225
		18.9464	18.9464	12.4093	11.7595	7.18693		0.235864	0.849176
		19.2185		11.6383
		18.6744		11.2309
		17.3533	17.6245	10.5941	10.3618	7.26276		0.311689	0.805698
		18.0997		10.0596
		17.4206		10.4317
	T250+FU	18.1716	18.0248	10.9084	10.6094	7.41543		0.464361	0.724792	1.3136	0.104594	0.00382774
		18.4299		10.3211								to T250
		17.4731		10.5988
		18.5576	18.0714	11.5885	10.8283	7.24312		0.292051	0.81674
		17.5548		10.1029
		18.1018		10.7935
		19.1958	18.6666	11.1603	11.5474	7.11922		0.168156	0.88998
		18.2361		11.9345
		18.5679
		17.9666	18.0251	9.94116	10.3404	7.68468		0.733613	0.601396
		18.2209		10.8136
		17.8876		10.2663
	T125+FN	18.977	18.9715	11.2128	11.2714	7.70014		0.749073	0.594986	0.795246	0.0888767	0.00578019
				11.5654								to T125
		18.9661		11.0359
		18.4907	18.2838	11.0945	10.9916	7.29228		0.341216	0.789376
		18.3878		11.0841
		17.973		10.7961
		18.2333	18.4405	11.1376	11.3165	7.12402		0.172952	0.887026
		18.4748		11.5122
		18.6136		11.2998
		18.5013	18.8788	11.7243	11.6421	7.23666		0.285595	0.820403
		18.9026		11.6393
		19.2324		11.5627
	T250+FN	17.5605	17.7158	10.3387	10.2927	7.42309		0.47202	0.720955	1.14938	0.314335	0.000932345
		17.871		10.2467								to T250
		17.667	17.667	9.89763	10.0167	7.65029		0.699222	0.615904
		17.8565		10.0523
		17.4774		10.1001
		18.0758	18.1701	10.7855	10.8297	7.34041		0.38934	0.763479
		18.2645		10.8739
		16.8209	17.0836	9.94572	9.86702	7.21659		0.265522	0.831897
		17.2769		9.95264
		17.153		9.7027

## Sheet: BENaC WB
	Group	β-ENaC	GAPDH	Ratio of α-ENaC/GAPDH	Average	SEM	T-test
	S	17.8841	13.023	1.37327	1.35804	0.0846329
		19.853	13.267	1.49642
		9.86672	8.192	1.20443
	O	11.8958	14.163	0.839919	0.724641	0.0633008	0.00496587
		9.24995	14.879	0.621678
		11.445	16.067	0.712327
	T125	13.6939	12.036	1.13775	1.27335	0.0678042	0.00415083
		16.0201	11.956	1.33992
		12.1244	9.032	1.34238
	T250	18.9168	11.814	1.60122	1.5724	0.0775187	0.00126284
		13.6788	9.592	1.42606
		26.8223	15.872	1.68991
	T125+FU	10.1219	13.332	0.759216	0.79116	0.0677282	0.00732635
		12.3312	13.387	0.921133
		8.50889	12.276	0.693132
	T250+FU	10.9173	12.237	0.892159	0.869835	0.0454192	0.00333512
		9.13315	11.673	0.782417
		11.8296	12.653	0.934928
	T125+FN	8.08593	13.263	0.609661	0.69823	0.0508823	0.00322064
		9.56666	13.684	0.699113
		9.64554	12.273	0.785916
	T250+FN	8.48423	10.132	0.837369	0.810786	0.0490987	0.00230871
		10.1672	11.562	0.87936
		9.75759	13.635	0.715628

## Sheet: GENaC mRNA
	Group	γ-ENaC		GAPDH		ΔCт	Average ΔCт	ΔΔCт	Fold Change	Average FC	SEM	T test
		Cт	Cт Mean	Cт	Cт Mean
	S	17.9121	18.8655	11.0438	11.4062	7.45931	7.32544	0.133865	0.911386	1.04555	0.166242
		19.5157		12.2226
		19.1687		10.9523
		19.2599	19.2438	12.0109	11.9596	7.28417		-0.0412675	1.02902
		19.2277		12.2
				11.668
		18.3755	18.1624	10.6875	10.8825	7.27991		-0.0455289	1.03206
		18.136		10.9561
		17.9756		11.0038
		18.2078	17.9746	11.0614	10.6962	7.27837		-0.0470687	1.03316
		17.8386		10.5914
		17.8772		10.4357
	O	19.6545	19.5796	12.2756	11.9415	7.63814		0.312699	0.805134	0.956867	0.0595191	0.00125854
		19.3113		11.8038								to S
		19.773		11.745
		19.6786	19.6786	12.2632	11.9251	7.75352		0.428076	0.743252
		19.3684		11.4364
		19.9888		12.0757
		19.7009	19.9416	11.8866	12.1903	7.75128		0.425836	0.744407
		19.9078		12.494
		20.2161
		19.0812	18.6914	10.9312	10.9349	7.75648		0.431042	0.741726
		18.3735		11.1306
		18.6195		10.743
	T125	19.1654	19.5186	11.9945	12.2978	7.22075		-0.10469	1.07526	1.68074	0.106655	0.000750721
		19.3723		12.1949								to O
		20.0181		12.7041
		19.1432	18.8268	12.1575	11.7442	7.08251		-0.242934	1.1834
		18.3674		11.3821
		18.9696		11.6932
		19.4711	19.4235	12.5738	12.1949	7.22863		-0.0968082	1.0694
		19.3358		11.9376
		19.4637		12.0733
		18.4999	19.0381	11.8748	11.9959	7.04215		-0.283294	1.21697
		18.2793		12.1409
		20.3351		11.9721
	T250	19.2461	19.403	12.6394	12.614	6.78896		-0.536478	1.45043	1.63927	0.0710302	0.00356632
		19.5599		12.9842								to O
				12.2185
		18.9834	19.2499	12.0061	12.2382	7.01164		-0.3138	1.24298
		19.5409		12.3061
		19.2253		12.4024
		18.9292	18.9074	11.9265	11.8093	7.09815		-0.227293	1.17064
		19.0429		12.0724
		18.7502		11.429
		18.3296	18.0679	11.1093	10.9716	7.09629		-0.229156	1.17215
		17.9584		10.6059
		17.9158		11.1998
	T125+FU	18.5851	19.0729	10.3706	10.9044	8.16857		0.843125	0.557435	0.944756	0.0621367	0.00148198
		19.6134		11.5174								to T125
		19.0203		10.8251
		19.1533	19.1394	11.2948	11.3396	7.79978		0.474343	0.719795
		19.2605		11.3015
		19.0044		11.4225
		19.2931	19.3577	12.4093	11.7595	7.59819		0.272751	0.827739
		19.5065		11.6383
		19.2736		11.2309
		18.1921	18.0858	10.5941	10.3618	7.72399		0.398546	0.758622
		18.1156		10.0596
		17.9496		10.4317
	T250+FU	19.0243	18.7437	10.9084	10.6094	8.1343		0.80886	0.570833	1.3136	0.104594	0.00160712
		18.3632		10.3211								to T250
		18.8436		10.5988
		18.5835	18.3324	11.5885	10.8283	7.5041		0.178659	0.883524
		18.0812		10.1029
				10.7935
		19.014	19.2118	11.1603	11.5474	7.66444		0.339002	0.790588
		19.0124		11.9345
		19.6091
		18.1467	18.3869	9.94116	10.3404	8.04653		0.721085	0.606641
		18.8104		10.8136
		18.2036		10.2663
	T125+FN	19.1542	19.2154	11.2128	11.2714	7.94397		0.618527	0.651336	0.795246	0.0888767	0.000208558
		19.6582		11.5654								to T125
		18.8337		11.0359
		18.5405	18.6213	11.0945	10.9916	7.62975		0.304304	0.809833
		18.513		11.0841
		18.8103		10.7961
		19.4618	19.0655	11.1376	11.3165	7.74894		0.423495	0.745616
		18.8112		11.5122
		18.9234		11.2998
		19.4992	19.4322	11.7243	11.6421	7.7901		0.464657	0.724643
		19.4407		11.6393
		19.3568		11.5627
	T250+FN	18.384	18.2026	10.3387	10.2927	7.90996		0.584518	0.666872	1.14938	0.314335	0.000768793
		18.0213		10.2467								to T250
		17.8222	17.9998	9.89763	10.0167	7.98316		0.657718	0.63388
		17.9638		10.0523
		18.2135		10.1001
		18.2719	18.4064	10.7855	10.8297	7.57674		0.251295	0.840142
		18.0818		10.8739
		18.8657
		17.7947	17.7259	9.94572	9.86702	7.85884		0.533397	0.690926
		17.981		9.95264
		17.4019		9.7027

## Sheet: GENaC WB
	Group	γ-ENaC Uncleaved	GAPDH	Ratio of α-ENaC/GAPDH	Average	SEM	T-test			Group	γ-ENaC Cleaved	GAPDH	Ratio of α-ENaC/GAPDH	Average	SEM	T-test
	S	17.5266	16.297	1.07545	1.08615	0.00644331				S	10.9073	16.297	0.669285	0.710827	0.0362039
		12.4146	11.439	1.08528							8.95626	11.439	0.782958
		14.2099	12.945	1.09772							8.80568	12.945	0.680238
	O	9.80519	13.075	0.749919	0.834229	0.0456552	0.0292621			O	11.6013	13.075	0.887289	0.836269	0.0529051	0.131255
		10.8739	12.853	0.846018							9.38888	12.853	0.730481
		11.6925	12.895	0.906749							11.4899	12.895	0.891037
	T125	16.2264	11.286	1.43775	1.37211	0.0494404	0.00136398			T125	16.9117	11.286	1.49846	1.52416	0.0351998	0.000840272
		18.3458	13.073	1.40333							20.8353	13.073	1.59377
		17.7144	13.891	1.27524							20.562	13.891	1.48024
	T250	23.2506	13.667	1.70122	1.54917	0.0788871	0.0033952			T250	21.6447	13.667	1.58372	1.59913	0.0344029	0.000618366
		20.6406	13.673	1.50959							22.7642	13.673	1.66491
		18.0046	12.532	1.43669							19.409	12.532	1.54876
	T125+FU	8.77614	11.183	0.784775	0.826219	0.0411229	0.001218			T125+FU	8.92683	11.183	0.79825	0.85715	0.0307929	0.000156857
		9.17211	11.678	0.785417							10.5356	11.678	0.902177
		12.0335	13.246	0.908464							11.5376	13.246	0.871023
	T250+FU	7.55132	11.455	0.659216	0.728234	0.0682262	0.00153276			T250+FU	10.575	11.455	0.923175	0.837785	0.0538647	0.000685979
		9.84788	11.389	0.864683							9.70313	11.389	0.851974
		7.49747	11.346	0.660803							8.3757	11.346	0.738207
	T125+FN	11.9826	15.984	0.749661	0.755222	0.0270072	0.00141239			T125+FN	13.2319	15.984	0.827823	0.829887	0.0263084	0.000155984
		9.51382	13.372	0.711474							10.5022	13.372	0.785386
		9.6399	11.982	0.804532							10.5016	11.982	0.876451
	T250+FN	4.8812	7.053	0.692074	0.750292	0.0391855	0.00310724			T250+FN	6.20126	7.053	0.879238	0.766026	0.0918761	0.00618542
		9.19142	12.523	0.733963							7.31439	12.523	0.584076
		9.20766	11.163	0.824838							9.31847	11.163	0.834764

## Sheet: Testosterone level
	Group	Testosterone level				T test
		ng/ml	Mean	SEM	MEAN ± SEM
	S	2.059	2.88912	0.383671	2.89 ± 0.38
		1.885
		3.625
		3.422
		2.697
		4.727
		3.277
		1.421
	O	0.319	0.248571	0.200062	0.25 ± 0.20	0.000231695
		0.174				to S
		0.29
		0.203
		0.261
		0.261
		0.232
	T125	1.74	3.37125	0.401265	3.37 ± 0.40	0.000106965
		4.756				to O
		4.698
		2.291
		3.567
		3.48
		4.06
		2.378
	T250	5.278	4.118	0.589825	4.12 ± 0.55	0.000597465
		4.64				to O
		2.523
		2.262
		2.726
		5.51
		5.887
